# Supplementary material
Source: Springer Nature journal article supplement (https://www.springermedizin.de/resource/supplementary/12936_2012_2751_MOESM2_ESM.pdf/9544152)
Supplement: MOESM2 [file 9544152]

## Additional File 2 : References

| Authors           | Year  | Title                                                                                                                                                                                                                                                                                 | Journal                                                                                              | Volume | Issue | Pages    | Accession No. |
|-------------------|-------|---------------------------------------------------------------------------------------------------------------------------------------------------------------------------------------------------------------------------------------------------------------------------------------|------------------------------------------------------------------------------------------------------|--------|-------|----------|---------------|
| 4ABC Study Group  | 2011  | A head-to-head comparison of four artemisinin-based combinations for treating uncomplicated malaria in African children: a randomized trial                                                                                                                                           | PLoS medicine                                                                                        | 8      | 11    | e1001119 | 22087077      |
| Abacassamo et al. | 2004  | Efficacy of chloroquine, amodiaquine, sulphadoxine-pyrimethamine and combination therapy with artesunate in Mozambican children with non-complicated malaria                                                                                                                          | Tropical medicine & international health : TM & IH                                                   | 9      | 2     | 200-8    | 15040556      |
| Abdulla et al.    | 2008  | Efficacy and safety of artemether-lumefantrine dispersible tablets compared with crushed commercial tablets in African infants and children with uncomplicated malaria: a randomised, single-blind, multicentre trial                                                                 | Lancet                                                                                               | 372    | 9652  | 1819-27  | 18926569      |
| Achan et al.      | 2009  | Effectiveness of quinine versus artemether-lumefantrine for treating uncomplicated falciparum malaria in Ugandan children: randomised trial                                                                                                                                           | BMJ (Clinical research ed.)                                                                          | 339    |       | b2763    | 19622553      |
| Adam et al.       | 2006  | A fixed-dose 24-hour regimen of artesunate plus sulfamethoxy-pyrazine-pyrimethamine for the treatment of uncomplicated Plasmodium falciparum malaria in eastern Sudan                                                                                                                 | Annals of clinical microbiology and antimicrobials                                                   | 5      |       | 18       | 16934158      |
| Adam et al.       | 2005a | Efficacies of mefloquine alone and of artesunate followed by mefloquine, for the treatment of uncomplicated, Plasmodium falciparum malaria in eastern Sudan                                                                                                                           | Annals of tropical medicine and parasitology                                                         | 99     | 2     | 111-7    | 15814029      |
| Adam et al.       | 2005b | A comparison of the efficacy of artesunate plus sulfadoxine-pyrimethamine with that of sulfadoxine-pyrimethamine alone, in the treatment of uncomplicated, Plasmodium falciparum malaria in eastern Sudan                                                                             | Annals of tropical medicine and parasitology                                                         | 99     | 5     | 449-55   | 16004704      |
| Adjei et al.      | 2008  | Amodiaquine-artesunate vs artemether-lumefantrine for uncomplicated malaria in Ghanaian children: a randomized efficacy and safety trial with one year follow-up                                                                                                                      | Malaria journal                                                                                      | 7      |       | 127      | 18620577      |
| Adjuik et al.     | 2002  | Amodiaquine-artesunate versus amodiaquine for uncomplicated Plasmodium falciparum malaria in African children: a randomised, multicentre trial                                                                                                                                        | Lancet                                                                                               | 359    | 9315  | 1365-72  | 11978332      |
| Agomo et al.      | 2008  | Efficacy, safety and tolerability of artesunate-mefloquine in the treatment of uncomplicated Plasmodium falciparum malaria in four geographic zones of Nigeria                                                                                                                        | Malaria journal                                                                                      | 7      |       | 172      | 18782445      |
| Alecrim et al.    | 2006  | Successful treatment of Plasmodium falciparum malaria with a six-dose regimen of artemether-lumefantrine versus quinine-doxycycline in the Western Amazon region of Brazil                                                                                                            | The American journal of tropical medicine and hygiene                                                | 74     | 1     | 20-5     | 16407341      |
| Allen et al.      | 2009  | Efficacy of sulphadoxine-pyrimethamine with or without artesunate for the treatment of uncomplicated Plasmodium falciparum malaria in southern Mozambique: a randomized controlled trial                                                                                              | Malaria journal                                                                                      | 8      |       | 141      | 19558654      |
| Asante et al.     | 2009  | Adherence to Artesunate-Amodiaquine Therapy for Uncomplicated Malaria in Rural Ghana: A Randomised Trial of Supervised versus Unsupervised Drug Administration                                                                                                                        | Journal of tropical medicine                                                                         | 2009   |       | 529583   | 20339565      |
| Ashley et al.     | 2004  | Randomized, controlled dose-optimization studies of dihydroartemisinin-piperaquine for the treatment of uncomplicated multidrug-resistant falciparum malaria in Thailand                                                                                                              | The Journal of infectious diseases                                                                   | 190    | 10    | 1773-82  | 15499533      |
| Ashley et al.     | 2005  | A randomized, controlled study of a simple, once-daily regimen of dihydroartemisinin-piperaquine for the treatment of uncomplicated, multidrug-resistant falciparum malaria                                                                                                           | Clinical infectious diseases : an official publication of the Infectious Diseases Society of America | 41     | 4     | 425-32   | 16028147      |
| Ashley et al.     | 2006  | An open label randomized comparison of mefloquine-artesunate as separate tablets vs. a new co-formulated combination for the treatment of uncomplicated multidrug-resistant falciparum malaria in Thailand                                                                            | Tropical medicine & international health : TM & IH                                                   | 11     | 11    | 1653-60  | 17054744      |
| Ashley et al.     | 2007  | Pharmacokinetic study of artemether-lumefantrine given once daily for the treatment of uncomplicated multidrug-resistant falciparum malaria                                                                                                                                           | Tropical medicine & international health : TM & IH                                                   | 12     | 2     | 201-8    | 17300626      |
| Asih et al.       | 2009  | Efficacy of artemisinin-based combination therapy for treatment of persons with uncomplicated Plasmodium falciparum malaria in West Sumba District, East Nusa Tenggara Province, Indonesia, and genotypic profiles of the parasite                                                    | The American journal of tropical medicine and hygiene                                                | 80     | 6     | 914-8    | 19478248      |
| Assefa et al.     | 2010  | Therapeutic efficacy of Artemether/Lumefantrine (Coartem(R)) against Plasmodium falciparum in Kersa, South West Ethiopia                                                                                                                                                              | Parasites & vectors                                                                                  | 3      | 1     | 1        | 20051120      |
| Avila et al.      | 2004  | Efficacy of mefloquine and mefloquine-artesunate for the treatment of uncomplicated Plasmodium falciparum malaria in the Amazon region of Bolivia                                                                                                                                     | Tropical medicine & international health : TM & IH                                                   | 9      | 2     | 217-21   | 15040558      |
| Ayede et al.      | 2010  | An open randomized clinical trial in comparing two artesunate-based combination treatments on Plasmodium falciparum malaria in Nigerian children: artesunate/sulphamethoxy-pyrazine/pyrimethamine (fixed dose over 24 hours) versus artesunate/amodiaquine (fixed dose over 48 hours) | Malaria journal                                                                                      | 9      |       | 378      | 21194422      |

## Additional File 2 : References

| Authors              | Year  | Title                                                                                                                                                                                                           | Journal                                                                                              | Volume | Issue | Pages   | Accession No. |
|----------------------|-------|-----------------------------------------------------------------------------------------------------------------------------------------------------------------------------------------------------------------|------------------------------------------------------------------------------------------------------|--------|-------|---------|---------------|
| Barennes et al.      | 2004  | A randomized trial of amodiaquine and artesunate alone and in combination for the treatment of uncomplicated falciparum malaria in children from Burkina Faso                                                   | Tropical medicine & international health : TM & IH                                                   | 9      | 4     | 438-44  | 15078261      |
| Bassat et al.        | 2009  | Dihydroartemisinin-piperaquine and artemether-lumefantrine for treating uncomplicated malaria in African children: a randomised, non-inferiority trial                                                          | PloS one                                                                                             | 4      | 11    | e7871   | 19936217      |
| Bell et al.          | 2008  | Sulfadoxine-pyrimethamine-based combinations for malaria: a randomised blinded trial to compare efficacy, safety and selection of resistance in Malawi                                                          | PloS one                                                                                             | 3      | 2     | e1578   | 18270569      |
| Bell et al.          | 2009  | Measurement of adherence, drug concentrations and the effectiveness of artemether-lumefantrine, chlorproguanil-dapsone or sulphadoxine-pyrimethamine in the treatment of uncomplicated malaria in Malawi        | Malaria journal                                                                                      | 8      |       | 204     | 19709418      |
| Bethell et al.       | 2011  | Artesunate dose escalation for the treatment of uncomplicated malaria in a region of reported artemisinin resistance: a randomized clinical trial                                                               | PloS one                                                                                             | 6      | 5     | e19283  | 21603629      |
| Blair et al.         | 2006  | Therapeutic efficacy test in malaria falciparum in Antioquia, Colombia                                                                                                                                          | Malaria journal                                                                                      | 5      |       | 14      | 16504002      |
| Bonnet et al.        | 2007  | Efficacy of antimalarial treatment in Guinea: in vivo study of two artemisinin combination therapies in Dabola and molecular markers of resistance to sulphadoxine-pyrimethamine in N'Zerekore                  | Malaria journal                                                                                      | 6      |       | 54      | 17477865      |
| Bonnet et al.        | 2009  | Varying efficacy of artesunate+amodiaquine and artesunate+sulphadoxine-pyrimethamine for the treatment of uncomplicated falciparum malaria in the Democratic Republic of Congo: a report of two in-vivo studies | Malaria journal                                                                                      | 8      |       | 192     | 19664280      |
| Borrmann et al.      | 2005  | Short-course regimens of artesunate-fosmidomycin in treatment of uncomplicated Plasmodium falciparum malaria                                                                                                    | Antimicrobial agents and chemotherapy                                                                | 49     | 9     | 3749-54 | 16127049      |
| Borrmann et al.      | 2011  | Declining responsiveness of Plasmodium falciparum infections to artemisinin-based combination treatments on the Kenyan coast                                                                                    | PloS one                                                                                             | 6      | 11    | e26005  | 22102856      |
| Bousema et al.       | 2006  | Moderate effect of artemisinin-based combination therapy on transmission of Plasmodium falciparum                                                                                                               | The Journal of infectious diseases                                                                   | 193    | 8     | 1151-9  | 16544256      |
| Bouyou-Akotet et al. | 2010  | Efficacy and safety of a new pediatric artesunate-mefloquine drug formulation for the treatment of uncomplicated falciparum malaria in Gabon                                                                    | Wiener klinische Wochenschrift                                                                       | 122    | 5-6   | 173-8   | 20361381      |
| Bukirwa et al.       | 2006  | Artemisinin combination therapies for treatment of uncomplicated malaria in Uganda                                                                                                                              | PLoS clinical trials                                                                                 | 1      | 1     | e7      | 16871329      |
| Campbell et al.      | 2006  | A randomized trial comparing the efficacy of four treatment regimens for uncomplicated falciparum malaria in Assam state, India                                                                                 | Transactions of the Royal Society of Tropical Medicine and Hygiene                                   | 100    | 2     | 108-18  | 16289651      |
| Chanda et al.        | 2006  | Assessment of the therapeutic efficacy of a paediatric formulation of artemether-lumefantrine (Coartem) for the treatment of uncomplicated Plasmodium falciparum in children in Zambia                          | Malaria journal                                                                                      | 5      |       | 75      | 16938133      |
| Charle et al.        | 2009  | Efficacy of Artesunate + Sulphadoxine-Pyrimethamine (AS + SP) and Amodiaquine + Sulphadoxine-Pyrimethamine (AQ + SP) for Uncomplicated falciparum Malaria in Equatorial Guinea (Central Africa)                 | Journal of tropical medicine                                                                         | 2009   |       | 781865  | 20339460      |
| de Oliveira et al.   | 2011  | Efficacy and effectiveness of mefloquine and artesunate combination therapy for uncomplicated Plasmodium falciparum malaria in the Peruvian Amazon                                                              | The American journal of tropical medicine and hygiene                                                | 85     | 3     | 573-8   | 21896825      |
| de Vries et al.      | 2000  | Combinations of artemisinin and quinine for uncomplicated falciparum malaria: efficacy and pharmacodynamics                                                                                                     | Antimicrobial agents and chemotherapy                                                                | 44     | 5     | 1302-8  | 10770766      |
| Denis et al.         | 2002  | Efficacy and safety of dihydroartemisinin-piperaquine (Artekin) in Cambodian children and adults with uncomplicated falciparum malaria                                                                          | Clinical infectious diseases : an official publication of the Infectious Diseases Society of America | 35     | 12    | 1469-76 | 12471565      |
| Denis et al.         | 2006a | Surveillance of the efficacy of artesunate and mefloquine combination for the treatment of uncomplicated falciparum malaria in Cambodia                                                                         | Tropical medicine & international health : TM & IH                                                   | 11     | 9     | 1360-6  | 16930257      |
| Denis et al.         | 2006b | Efficacy of artemether-lumefantrine for the treatment of uncomplicated falciparum malaria in northwest Cambodia                                                                                                 | Tropical medicine & international health : TM & IH                                                   | 11     | 12    | 1800-7  | 17176344      |
| Depoortere et al.    | 2005  | Efficacy and effectiveness of the combination of sulfadoxine/pyrimethamine and a 3-day course of artesunate for the treatment of uncomplicated falciparum malaria in a refugee settlement in Zambia             | Tropical medicine & international health : TM & IH                                                   | 10     | 2     | 139-45  | 15679556      |
| Diem Thuy et al.     | 2007  | Clinical efficacy of high dose monotherapy of oral dihydroartemisinin in uncomplicated falciparum malaria in viet nam                                                                                           | Japanese journal of infectious diseases                                                              | 60     | 4     | 161-6   | 17642523      |

## Additional File 2 : References

| Authors          | Year  | Title                                                                                                                                                                                                                                                           | Journal                                                                                       | Volume | Issue | Pages  | Accession No. |
|------------------|-------|-----------------------------------------------------------------------------------------------------------------------------------------------------------------------------------------------------------------------------------------------------------------|-----------------------------------------------------------------------------------------------|--------|-------|--------|---------------|
| Djimé et al.     | 2008  | Efficacy, safety, and selection of molecular markers of drug resistance by two ACTs in Mali                                                                                                                                                                     | The American journal of tropical medicine and hygiene                                         | 78     | 3     | 455-61 | 18337343      |
| Dondorp et al.   | 2009  | Artemisinin resistance in Plasmodium falciparum malaria                                                                                                                                                                                                         | The New England journal of medicine                                                           | 361    | 5     | 455-67 | 19641202      |
| Dunyo et al.     | 2011  | Randomized trial of safety and effectiveness of chlorproguanil-dapsone and lumefantrine-artemether for uncomplicated malaria in children in the Gambia                                                                                                          | PloS one                                                                                      | 6      | 6     | e17371 | 21666744      |
| Durrani et al.   | 2005  | Efficacy of combination therapy with artesunate plus amodiaquine compared to monotherapy with chloroquine, amodiaquine or sulfadoxine-pyrimethamine for treatment of uncomplicated Plasmodium falciparum in Afghanistan                                         | Tropical medicine & international health : TM & IH                                            | 10     | 6     | 521-9  | 15941414      |
| Elamin et al.    | 2010  | Descriptive study on the efficacy of artemether-lumefantrine in the treatment of uncomplicated Plasmodium falciparum malaria in Sudan                                                                                                                           | European journal of clinical pharmacology                                                     | 66     | 3     | 231-7  | 20187287      |
| Falade et al.    | 2005  | Efficacy and safety of artemether-lumefantrine (Coartem) tablets (six-dose regimen) in African infants and children with acute, uncomplicated falciparum malaria                                                                                                | Transactions of the Royal Society of Tropical Medicine and Hygiene                            | 99     | 6     | 459-67 | 15837358      |
| Falade et al.    | 2008a | High efficacy of two artemisinin-based combinations (artemether-lumefantrine and artesunate plus amodiaquine) for acute uncomplicated malaria in Ibadan, Nigeria                                                                                                | Tropical medicine & international health : TM & IH                                            | 13     | 5     | 635-43 | 18346028      |
| Falade et al.    | 2008b | Evaluation of the efficacy and safety of artemether-lumefantrine in the treatment of acute uncomplicated Plasmodium falciparum malaria in Nigerian infants and children                                                                                         | Malaria journal                                                                               | 7      |       | 246    | 19038036      |
| Fanello et al.   | 2007  | A randomised trial to assess the safety and efficacy of artemether-lumefantrine (Coartem) for the treatment of uncomplicated Plasmodium falciparum malaria in Rwanda                                                                                            | Transactions of the Royal Society of Tropical Medicine and Hygiene                            | 101    | 4     | 344-50 | 17005222      |
| Fanello et al.   | 2008  | A randomised trial to assess the efficacy and safety of chlorproguanil/dapsone + artesunate for the treatment of uncomplicated Plasmodium falciparum malaria                                                                                                    | Transactions of the Royal Society of Tropical Medicine and Hygiene                            | 102    | 5     | 412-20 | 18328518      |
| Faucher et al.   | 2009  | Comparison of sulfadoxine-pyrimethamine, unsupervised artemether-lumefantrine, and unsupervised artesunate-amodiaquine fixed-dose formulation for uncomplicated plasmodium falciparum malaria in Benin: a randomized effectiveness noninferiority trial         | The Journal of infectious diseases                                                            | 200    | 1     | 57-65  | 19469703      |
| Faye et al.      | 2007  | Efficacy and tolerability of four antimalarial combinations in the treatment of uncomplicated Plasmodium falciparum malaria in Senegal                                                                                                                          | Malaria journal                                                                               | 6      |       | 80     | 17570848      |
| Faye et al.      | 2010a | A randomized trial of artesunate mefloquine versus artemether lumefantrine for the treatment of uncomplicated Plasmodium falciparum malaria in Senegalese children                                                                                              | The American journal of tropical medicine and hygiene                                         | 82     | 1     | 140-4  | 20065010      |
| Faye et al.      | 2010b | Efficacy and tolerability of artesunate-amodiaquine (Camoquin plus) versus artemether-lumefantrine (Coartem) against uncomplicated Plasmodium falciparum malaria: multisite trial in Senegal and Ivory Coast                                                    | Tropical medicine & international health : TM & IH                                            | 15     | 5     | 608-13 | 20214761      |
| Fehintola et al. | 2008  | Effects of artesunate-cotrimoxazole and amodiaquine-artesunate against asexual and sexual stages of Plasmodium falciparum malaria in Nigerian children                                                                                                          | Journal of infection and chemotherapy : official journal of the Japan Society of Chemotherapy | 14     | 3     | 188-94 | 18574653      |
| Fehintola et al. | 2010  | Comparative study of efficacy of artesunate plus cotrimoxazole and artesunate plus chloroquine in the treatment of malaria in Nigerian children: a preliminary report                                                                                           | Journal of vector borne diseases                                                              | 47     | 3     | 145-50 | 20834083      |
| Gbotosho et al.  | 2011a | Therapeutic efficacy and effects of artemether-lumefantrine and artesunate-amodiaquine coformulated or copackaged on malaria-associated anemia in children with uncomplicated Plasmodium falciparum malaria in Southwest Nigeria                                | The American journal of tropical medicine and hygiene                                         | 84     | 5     | 813-9  | 21540395      |
| Gbotosho et al.  | 2011b | A Simple Dose Regimen of Artesunate and Amodiaquine Based on Age or Body Weight Range for Uncomplicated Falciparum Malaria in Children: Comparison of Therapeutic Efficacy With Standard Dose Regimen of Artesunate and Amodiaquine and Artemether-Lumefantrine | American journal of therapeutics                                                              |        |       |        | 21519221      |
| Giao et al.      | 2001  | Artemisinin for treatment of uncomplicated falciparum malaria: is there a place for monotherapy?                                                                                                                                                                | The American journal of tropical medicine and hygiene                                         | 65     | 6     | 690-5  | 11791958      |
| Giao et al.      | 2004  | CV8, a new combination of dihydroartemisinin, piperaquine, trimethoprim and primaquine, compared with atovaquone-proguanil against falciparum malaria in Vietnam                                                                                                | Tropical medicine & international health : TM & IH                                            | 9      | 2     | 209-16 | 15040557      |
| Gil et al.       | 2003  | Efficacy of artesunate plus chloroquine for uncomplicated malaria in children in Sao Tome and Principe: a double-blind, randomized, controlled trial                                                                                                            | Transactions of the Royal Society of Tropical Medicine and Hygiene                            | 97     | 6     | 703-6  | 16117967      |
| Gomez et al.     | 2003  | Randomised efficacy and safety study of two 3-day artesunate rectal capsule/mefloquine regimens versus artesunate alone for uncomplicated malaria in Ecuadorian children                                                                                        | Acta tropica                                                                                  | 89     | 1     | 47-53  | 14636982      |
| Grande et al.    | 2007  | A randomised controlled trial to assess the efficacy of dihydroartemisinin-piperaquine for the treatment of uncomplicated falciparum malaria in Peru                                                                                                            | PloS one                                                                                      | 2      | 10    | e1101  | 17971864      |

## Additional File 2 : References

| Authors            | Year  | Title                                                                                                                                                                                                                       | Journal                                                                                              | Volume | Issue | Pages   | Accession No. |
|--------------------|-------|-----------------------------------------------------------------------------------------------------------------------------------------------------------------------------------------------------------------------------|------------------------------------------------------------------------------------------------------|--------|-------|---------|---------------|
| Grandesso et al.   | 2006  | Low efficacy of the combination artesunate plus amodiaquine for uncomplicated falciparum malaria among children under 5 years in Kailahun, Sierra Leone                                                                     | Tropical medicine & international health : TM & IH                                                   | 11     | 7     | 1017-21 | 16827702      |
| Guthmann et al.    | 2005  | Antimalarial efficacy of chloroquine, amodiaquine, sulfadoxine-pyrimethamine, and the combinations of amodiaquine + artesunate and sulfadoxine-pyrimethamine + artesunate in Huambo and Bie provinces, central Angola       | Transactions of the Royal Society of Tropical Medicine and Hygiene                                   | 99     | 7     | 485-92  | 15876443      |
| Gutman et al.      | 2009  | Mefloquine pharmacokinetics and mefloquine-artesunate effectiveness in Peruvian patients with uncomplicated Plasmodium falciparum malaria                                                                                   | Malaria journal                                                                                      | 8      |       | 58      | 19358697      |
| Hamour et al.      | 2005  | Malaria in the Nuba Mountains of Sudan: baseline genotypic resistance and efficacy of the artesunate plus sulfadoxine-pyrimethamine and artesunate plus amodiaquine combinations                                            | Transactions of the Royal Society of Tropical Medicine and Hygiene                                   | 99     | 7     | 548-54  | 15869770      |
| Haque et al.       | 2007  | Therapeutic efficacy of artemether-lumefantrine for the treatment of uncomplicated Plasmodium falciparum malaria in Bangladesh                                                                                              | The American journal of tropical medicine and hygiene                                                | 76     | 1     | 39-41   | 17255226      |
| Hasugian et al.    | 2007  | Dihydroartemisinin-Piperaquine versus Artesunate-Amodiaquine: Superior Efficacy and Posttreatment Prophylaxis against Multidrug-Resistant <i>Plasmodium falciparum</i> and <i>Plasmodium vivax</i> Malaria                  | Clinical infectious diseases : an official publication of the Infectious Diseases Society of America | 44     |       | 1067-74 | 17366451      |
| Hatz et al.        | 2008  | Treatment of acute uncomplicated falciparum malaria with artemether-lumefantrine in nonimmune populations: a safety, efficacy, and pharmacokinetic study                                                                    | The American journal of tropical medicine and hygiene                                                | 78     | 2     | 241-7   | 18256423      |
| Hien et al.        | 2004  | Dihydroartemisinin-piperaquine against multidrug-resistant Plasmodium falciparum malaria in Vietnam: randomised clinical trial                                                                                              | Lancet                                                                                               | 363    | 9402  | 18-22   | 14723988      |
| Hombhanje et al.   | 2009  | Artemisinin-naphthoquine combination (ARCO) therapy for uncomplicated falciparum malaria in adults of Papua New Guinea: a preliminary report on safety and efficacy                                                         | Malaria journal                                                                                      | 8      |       | 196     | 19671190      |
| Hung et al.        | 2004  | Artesunate with mefloquine at various intervals for non-severe Plasmodium falciparum malaria                                                                                                                                | The American journal of tropical medicine and hygiene                                                | 71     | 2     | 160-6   | 15306704      |
| Huong et al.       | 2001  | Resistance of Plasmodium falciparum to antimalarial drugs in a highly endemic area of southern Viet Nam: a study in vivo and in vitro                                                                                       | Transactions of the Royal Society of Tropical Medicine and Hygiene                                   | 95     | 3     | 325-9   | 11491008      |
| Hutagalung et al.  | 2005  | A randomized trial of artemether-lumefantrine versus mefloquine-artesunate for the treatment of uncomplicated multi-drug resistant Plasmodium falciparum on the western border of Thailand                                  | Malaria journal                                                                                      | 4      |       | 46      | 16179089      |
| Hwang et al.       | 2011  | In vivo efficacy of artemether-lumefantrine against uncomplicated Plasmodium falciparum malaria in Central Ethiopia                                                                                                         | Malaria journal                                                                                      | 10     |       | 209     | 21798054      |
| Ibrahim et al.     | 2007  | Efficacies of artesunate plus either sulfadoxine-pyrimethamine or amodiaquine, for the treatment of uncomplicated, Plasmodium falciparum malaria in eastern Sudan                                                           | Annals of tropical medicine and parasitology                                                         | 101    | 1     | 15-21   | 17244406      |
| Janssens et al.    | 2007  | A randomized open study to assess the efficacy and tolerability of dihydroartemisinin-piperaquine for the treatment of uncomplicated falciparum malaria in Cambodia                                                         | Tropical medicine & international health : TM & IH                                                   | 12     | 2     | 251-9   | 17300633      |
| Juma et al.        | 2008  | A randomized, open-label, comparative efficacy trial of artemether-lumefantrine suspension versus artemether-lumefantrine tablets for treatment of uncomplicated Plasmodium falciparum malaria in children in western Kenya | Malaria journal                                                                                      | 7      |       | 262     | 19102746      |
| Kabanywanyi et al. | 2007  | Efficacy and safety of artemisinin-based antimalarial in the treatment of uncomplicated malaria in children in southern Tanzania                                                                                            | Malaria journal                                                                                      | 6      |       | 146     | 17996121      |
| Kamya et al.       | 2007  | Artemether-lumefantrine versus dihydroartemisinin-piperaquine for treatment of malaria: a randomized trial                                                                                                                  | PLoS clinical trials                                                                                 | 2      | 5     | e20     | 17525792      |
| Karema et al.      | 2006  | Safety and efficacy of dihydroartemisinin/piperaquine (Artekin) for the treatment of uncomplicated Plasmodium falciparum malaria in Rwandan children                                                                        | Transactions of the Royal Society of Tropical Medicine and Hygiene                                   | 100    | 12    | 1105-11 | 16766006      |
| Karunajeewa et al. | 2003  | Safety and therapeutic efficacy of artesunate suppositories for treatment of malaria in children in Papua New Guinea                                                                                                        | The Pediatric infectious disease journal                                                             | 22     | 3     | 251-6   | 12634587      |
| Karunajeewa et al. | 2008a | Pharmacokinetics and efficacy of piperaquine and chloroquine in Melanesian children with uncomplicated malaria                                                                                                              | Antimicrobial agents and chemotherapy                                                                | 52     | 1     | 237-43  | 17967917      |
| Karunajeewa et al. | 2008b | A trial of combination antimalarial therapies in children from Papua New Guinea                                                                                                                                             | The New England journal of medicine                                                                  | 359    | 24    | 2545-57 | 19064624      |
| Kayentao et al.    | 2009  | Artemisinin-based combinations versus amodiaquine plus sulphadoxine-pyrimethamine for the treatment of uncomplicated malaria in Faladje, Mali                                                                               | Malaria journal                                                                                      | 8      |       | 5       | 19128455      |

## Additional File 2 : References

| Authors            | Year | Title                                                                                                                                                                                                                                                        | Journal                                                                                              | Volume | Issue | Pages   | Accession No. |
|--------------------|------|--------------------------------------------------------------------------------------------------------------------------------------------------------------------------------------------------------------------------------------------------------------|------------------------------------------------------------------------------------------------------|--------|-------|---------|---------------|
| Kobbe et al.       | 2008 | A randomized trial on effectiveness of artemether-lumefantrine versus artesunate plus amodiaquine for unsupervised treatment of uncomplicated Plasmodium falciparum malaria in Ghanaian children                                                             | Malaria journal                                                                                      | 7      |       | 261     | 19099594      |
| Kofoed et al.      | 2003 | No benefits from combining chloroquine with artesunate for three days for treatment of Plasmodium falciparum in Guinea-Bissau                                                                                                                                | Transactions of the Royal Society of Tropical Medicine and Hygiene                                   | 97     | 4     | 429-33  | 15259473      |
| Koram et al.       | 2005 | Comparative efficacy of antimalarial drugs including ACTs in the treatment of uncomplicated malaria among children under 5 years in Ghana                                                                                                                    | Acta tropica                                                                                         | 95     | 3     | 194-203 | 16054584      |
| Koram et al.       | 2008 | Efficacy of amodiaquine/artesunate combination therapy for uncomplicated malaria in children under five years in Ghana                                                                                                                                       | Ghana medical journal                                                                                | 42     | 2     | 55-60   | 19180204      |
| Krudsood et al.    | 2000 | A randomized clinical trial of combinations of artesunate and azithromycin for treatment of uncomplicated Plasmodium falciparum malaria in Thailand                                                                                                          | The Southeast Asian journal of tropical medicine and public health                                   | 31     | 4     | 801-7   | 11414432      |
| Krudsood et al.    | 2002 | Artesunate and mefloquine given simultaneously for three days via a prepacked blister is equally effective and tolerated as a standard sequential treatment of uncomplicated acute Plasmodium falciparum malaria: randomized, double-blind study in Thailand | The American journal of tropical medicine and hygiene                                                | 67     | 5     | 465-72  | 12479545      |
| Krudsood et al.    | 2003 | Comparative clinical trial of two-fixed combinations dihydroartemisinin-naphthoquine-trimethoprim (DNP) and artemether-lumefantrine (Coartem/Riamet) in the treatment of acute uncomplicated falciparum malaria in Thailand                                  | The Southeast Asian journal of tropical medicine and public health                                   | 34     | 2     | 316-21  | 12971556      |
| Krudsood et al.    | 2007 | Dose ranging studies of new artemisinin-piperazine fixed combinations compared to standard regimens of artemisinin combination therapies for acute uncomplicated falciparum malaria                                                                          | The Southeast Asian journal of tropical medicine and public health                                   | 38     | 6     | 971-8   | 18613536      |
| Kshirsagar et al.  | 2000 | A randomized, double-blind, parallel-group, comparative safety, and efficacy trial of oral co-artemether versus oral chloroquine in the treatment of acute uncomplicated Plasmodium falciparum malaria in adults in India                                    | The American journal of tropical medicine and hygiene                                                | 62     | 3     | 402-8   | 11037786      |
| Lefevre et al.     | 2001 | A clinical and pharmacokinetic trial of six doses of artemether-lumefantrine for multidrug-resistant Plasmodium falciparum malaria in Thailand                                                                                                               | The American journal of tropical medicine and hygiene                                                | 64     | 5-6   | 247-56  | 11463111      |
| Marquino et al.    | 2003 | Efficacy of mefloquine and a mefloquine-artesunate combination therapy for the treatment of uncomplicated Plasmodium falciparum malaria in the Amazon Basin of Peru                                                                                          | The American journal of tropical medicine and hygiene                                                | 68     | 5     | 608-12  | 12812355      |
| Marquino et al.    | 2005 | Efficacy and tolerability of artesunate plus sulfadoxine-pyrimethamine and sulfadoxine-pyrimethamine alone for the treatment of uncomplicated Plasmodium falciparum malaria in Peru                                                                          | The American journal of tropical medicine and hygiene                                                | 72     | 5     | 568-72  | 15891131      |
| Martensson et al.  | 2005 | Efficacy of artesunate plus amodiaquine versus that of artemether-lumefantrine for the treatment of uncomplicated childhood Plasmodium falciparum malaria in Zanzibar, Tanzania                                                                              | Clinical infectious diseases : an official publication of the Infectious Diseases Society of America | 41     | 8     | 1079-86 | 16163624      |
| Massougbdji et al. | 2002 | A randomized, double-blind study on the efficacy and safety of a practical three-day regimen with artesunate and mefloquine for the treatment of uncomplicated Plasmodium falciparum malaria in Africa                                                       | Transactions of the Royal Society of Tropical Medicine and Hygiene                                   | 96     | 6     | 655-9   | 12625145      |
| Mayxay et al.      | 2004 | Randomized comparison of chloroquine plus sulfadoxine-pyrimethamine versus artesunate plus mefloquine versus artemether-lumefantrine in the treatment of uncomplicated falciparum malaria in the Lao People's Democratic Republic                            | Clinical infectious diseases : an official publication of the Infectious Diseases Society of America | 39     | 8     | 1139-47 | 15486837      |
| Mayxay et al.      | 2006 | An open, randomized comparison of artesunate plus mefloquine vs. dihydroartemisinin-piperazine for the treatment of uncomplicated Plasmodium falciparum malaria in the Lao People's Democratic Republic (Laos)                                               | Tropical medicine & international health : TM & IH                                                   | 11     | 8     | 1157-65 | 16903879      |
| Menan et al.       | 2011 | Comparative study of the efficacy and tolerability of dihydroartemisinin-piperazine-trimethoprim versus artemether-lumefantrine in the treatment of uncomplicated Plasmodium falciparum malaria in Cameroon, Ivory Coast and Senegal                         | Malaria journal                                                                                      | 10     |       | 185     | 21740570      |
| Ménard et al.      | 2007 | Randomized clinical trial of artemisinin versus non-artemisinin combination therapy for uncomplicated falciparum malaria in Madagascar                                                                                                                       | Malaria journal                                                                                      | 6      |       | 65      | 17519010      |
| Ménard et al.      | 2008 | Assessment of the efficacy of antimalarial drugs recommended by the National Malaria Control Programme in Madagascar: up-dated baseline data from randomized and multi-site clinical trials                                                                  | Malaria journal                                                                                      | 7      |       | 55      | 18394169      |

## Additional File 2 : References

| Authors             | Year  | Title                                                                                                                                                                                                                                            | Journal                                                                                              | Volume | Issue | Pages   | Accession No. |
|---------------------|-------|--------------------------------------------------------------------------------------------------------------------------------------------------------------------------------------------------------------------------------------------------|------------------------------------------------------------------------------------------------------|--------|-------|---------|---------------|
| Mens et al.         | 2008  | A randomized trial to monitor the efficacy and effectiveness by QT-NASBA of artemether-lumefantrine versus dihydroartemisinin-piperaquine for treatment and transmission control of uncomplicated Plasmodium falciparum malaria in western Kenya | Malaria journal                                                                                      | 7      |       | 237     | 19017387      |
| Meremikwu et al.    | 2006  | Artemether-lumefantrine versus artesunate plus amodiaquine for treating uncomplicated childhood malaria in Nigeria: randomized controlled trial                                                                                                  | Malaria journal                                                                                      | 5      |       | 43      | 16704735      |
| Michael et al.      | 2010  | Early variations in plasmodium falciparum dynamics in Nigerian children after treatment with two artemisinin-based combinations: implications on delayed parasite clearance                                                                      | Malaria journal                                                                                      | 9      |       | 335     | 21092220      |
| Mockenhaupt et al.  | 2005  | A randomized, placebo-controlled, double-blind trial on sulfadoxine-pyrimethamine alone or combined with artesunate or amodiaquine in uncomplicated malaria                                                                                      | Tropical medicine & international health : TM & IH                                                   | 10     | 6     | 512-20  | 15941413      |
| Mohamed et al.      | 2006  | The efficacies of artesunate-sulfadoxine-pyrimethamine and artemether-lumefantrine in the treatment of uncomplicated, Plasmodium falciparum malaria, in an area of low transmission in central Sudan                                             | Annals of tropical medicine and parasitology                                                         | 100    | 1     | 5-10    | 16417707      |
| Mukhtar et al.      | 2007  | A comparative study on the efficacy of artesunate plus sulphadoxine/pyrimethamine versus artemether-lumefantrine in eastern Sudan                                                                                                                | Malaria journal                                                                                      | 6      |       | 92      | 17631681      |
| Mulenga et al.      | 2006  | Safety and efficacy of lumefantrine-artemether (Coartem) for the treatment of uncomplicated Plasmodium falciparum malaria in Zambian adults                                                                                                      | Malaria journal                                                                                      | 5      |       | 73      | 16923176      |
| Mutabingwa et al.   | 2005  | Amodiaquine alone, amodiaquine+sulfadoxine-pyrimethamine, amodiaquine+artesunate, and artemether-lumefantrine for outpatient treatment of malaria in Tanzanian children: a four-arm randomised effectiveness trial                               | Lancet                                                                                               | 365    | 9469  | 1474-80 | 15850631      |
| Na-Bangchang et al. | 2010  | Declining in efficacy of a three-day combination regimen of mefloquine-artesunate in a multi-drug resistance area along the Thai-Myanmar border                                                                                                  | Malaria journal                                                                                      | 9      |       | 273     | 20929590      |
| Nahum et al.        | 2007  | Adding artesunate to sulphadoxine-pyrimethamine greatly improves the treatment efficacy in children with uncomplicated falciparum malaria on the coast of Benin, West Africa                                                                     | Malaria journal                                                                                      | 6      |       | 170     | 18154655      |
| Nambei et al.       | 2005  | Efficacy comparison between anti-malarial drugs in Africans presenting with mild malaria in the Central Republic of Africa: a preliminary study                                                                                                  | Parasite (Paris France)                                                                              | 12     | 1     | 73-7    | 15828586      |
| Nambozi et al.      | 2011  | Safety and efficacy of dihydroartemisinin-piperaquine versus artemether-lumefantrine in the treatment of uncomplicated Plasmodium falciparum malaria in Zambian children                                                                         | Malaria journal                                                                                      | 10     |       | 50      | 21352609      |
| Ndayiragije et al.  | 2004  | Efficacy of therapeutic combinations with artemisinin derivatives in the treatment of non complicated malaria in Burundi                                                                                                                         | Tropical medicine & international health : TM & IH                                                   | 9      | 6     | 673-9   | 15189457      |
| Ndiaye et al.       | 2008  | Randomized, comparative study of the efficacy and safety of artesunate plus amodiaquine, administered as a single daily intake versus two daily intakes in the treatment of uncomplicated falciparum malaria                                     | Malaria journal                                                                                      | 7      |       | 16      | 18205945      |
| Ndiaye et al.       | 2009  | Randomized, multicentre assessment of the efficacy and safety of ASAQ--a fixed-dose artesunate-amodiaquine combination therapy in the treatment of uncomplicated Plasmodium falciparum malaria                                                   | Malaria journal                                                                                      | 8      |       | 125     | 19505304      |
| Ngasala et al.      | 2011a | Effectiveness of artemether-lumefantrine provided by community health workers in under-five children with uncomplicated malaria in rural Tanzania: an open label prospective study                                                               | Malaria journal                                                                                      | 10     |       | 64      | 21410954      |
| Ngasala et al.      | 2011b | Efficacy and effectiveness of artemether-lumefantrine after initial and repeated treatment in children <5 years of age with acute uncomplicated Plasmodium falciparum malaria in rural Tanzania: a randomized trial                              | Clinical infectious diseases : an official publication of the Infectious Diseases Society of America | 52     | 7     | 873-82  | 21427394      |
| Nguyen et al.       | 2003  | Treatment of uncomplicated falciparum malaria in southern Vietnam: can chloroquine or sulfadoxine-pyrimethamine be reintroduced in combination with artesunate?                                                                                  | Clinical infectious diseases : an official publication of the Infectious Diseases Society of America | 37     | 11    | 1461-6  | 14614668      |
| Noedl et al.        | 2006  | Azithromycin combination therapy with artesunate or quinine for the treatment of uncomplicated Plasmodium falciparum malaria in adults: a randomized, phase 2 clinical trial in Thailand                                                         | Clinical infectious diseases : an official publication of the Infectious Diseases Society of America | 43     | 10    | 1264-71 | 17051490      |
| Noedl et al.        | 2010  | Artemisinin resistance in Cambodia: a clinical trial designed to address an emerging problem in Southeast Asia                                                                                                                                   | Clinical infectious diseases : an official publication of the Infectious Diseases Society of America | 51     | 11    | e82-9   | 21028985      |
| Obonyo et al.       | 2003  | Artesunate plus sulfadoxine-pyrimethamine for uncomplicated malaria in Kenyan children: a randomized, double-blind, placebo-controlled trial                                                                                                     | Transactions of the Royal Society of Tropical Medicine and Hygiene                                   | 97     | 5     | 585-91  | 15307433      |
| Oduro et al.        | 2004  | A randomized, comparative study of two regimens of beta-artemether for the treatment of uncomplicated, Plasmodium falciparum malaria, in northern Ghana                                                                                          | Annals of tropical medicine and parasitology                                                         | 98     | 5     | 433-40  | 15257791      |

## Additional File 2 : References

| Authors                 | Year | Title                                                                                                                                                                                                                                                                                           | Journal                                                                                                                         | Volume | Issue | Pages   | Accession No. |
|-------------------------|------|-------------------------------------------------------------------------------------------------------------------------------------------------------------------------------------------------------------------------------------------------------------------------------------------------|---------------------------------------------------------------------------------------------------------------------------------|--------|-------|---------|---------------|
| Oduro et al.            | 2008 | A randomized, comparative study of supervised and unsupervised artesunate-amodiaquine, for the treatment of uncomplicated malaria in Ghana                                                                                                                                                      | Annals of tropical medicine and parasitology                                                                                    | 102    | 7     | 565-76  | 18817597      |
| Osorio et al.           | 2007 | Artemisinin-based combination therapy for uncomplicated Plasmodium falciparum malaria in Colombia                                                                                                                                                                                               | Malaria journal                                                                                                                 | 6      |       | 25      | 17328806      |
| Owusu-Agyei et al.      | 2008 | An open label, randomised trial of artesunate+amodiaquine, artesunate+chlorproguanil-dapsone and artemether-lumefantrine for the treatment of uncomplicated malaria                                                                                                                             | PloS one                                                                                                                        | 3      | 6     | e2530   | 18575626      |
| Oyakhire et al.         | 2007 | Artesunate--amodiaquine combination therapy for falciparum malaria in young Gabonese children                                                                                                                                                                                                   | Malaria journal                                                                                                                 | 6      |       | 29      | 17352806      |
| Penali et al.           | 2008 | Single-day, three-dose treatment with fixed dose combination artesunate/sulfamethoxyprazine/pyrimethamine to cure Plasmodium falciparum malaria                                                                                                                                                 | International journal of infectious diseases : IJID : official publication of the International Society for Infectious Diseases | 12     | 4     | 430-7   | 18343702      |
| Piola et al.            | 2005 | Supervised versus unsupervised intake of six-dose artemether-lumefantrine for treatment of acute, uncomplicated Plasmodium falciparum malaria in Mbarara, Uganda: a randomised trial                                                                                                            | Lancet                                                                                                                          | 365    | 9469  | 1467-73 | 15850630      |
| Premji et al.           | 2009 | Chlorproguanil-dapsone-artesunate versus artemether-lumefantrine: a randomized, double-blind phase III trial in African children and adolescents with uncomplicated Plasmodium falciparum malaria                                                                                               | PloS one                                                                                                                        | 4      | 8     | e6682   | 19690618      |
| Priotto et al.          | 2003 | Artesunate and sulfadoxine-pyrimethamine combinations for the treatment of uncomplicated Plasmodium falciparum malaria in Uganda: a randomized, double-blind, placebo-controlled trial                                                                                                          | Transactions of the Royal Society of Tropical Medicine and Hygiene                                                              | 97     | 3     | 325-30  | 15228253      |
| Pukrittayakamee et al.  | 2004 | Activities of artesunate and primaquine against asexual- and sexual-stage parasites in falciparum malaria                                                                                                                                                                                       | Antimicrobial agents and chemotherapy                                                                                           | 48     | 4     | 1329-34 | 15047537      |
| Rahman et al.           | 2008 | Adherence and efficacy of supervised versus non-supervised treatment with artemether/lumefantrine for the treatment of uncomplicated Plasmodium falciparum malaria in Bangladesh: a randomised controlled trial                                                                                 | Transactions of the Royal Society of Tropical Medicine and Hygiene                                                              | 102    | 9     | 861-7   | 18606428      |
| Ramharter et al.        | 2005 | Artesunate-clindamycin versus quinine-clindamycin in the treatment of Plasmodium falciparum malaria: a randomized controlled trial                                                                                                                                                              | Clinical infectious diseases : an official publication of the Infectious Diseases Society of America                            | 40     | 12    | 1777-84 | 15909266      |
| Rasheed et al.          | 2011 | Efficacy and safety of artemether-lumefantrine in uncomplicated falciparum malaria in Liberia                                                                                                                                                                                                   | JPMA. The Journal of the Pakistan Medical Association                                                                           | 61     | 2     | 131-4   | 21375159      |
| Ratcliff et al.         | 2007 | Two fixed-dose artemisinin combinations for drug-resistant falciparum and vivax malaria in Papua, Indonesia: an open-label randomised comparison                                                                                                                                                | Lancet                                                                                                                          | 369    | 9563  | 757-65  | 17336652      |
| Rojanawatsirivej et al. | 2003 | Monitoring the therapeutic efficacy of antimalarials against uncomplicated falciparum malaria in Thailand                                                                                                                                                                                       | The Southeast Asian journal of tropical medicine and public health                                                              | 34     | 3     | 536-41  | 15115123      |
| Rulisa et al.           | 2007 | Comparison of different artemisinin-based combinations for the treatment of Plasmodium falciparum malaria in children in Kigali, Rwanda, an area of resistance to sulfadoxine-pyrimethamine: artesunate plus sulfadoxine/pyrimethamine versus artesunate plus sulfamethoxyprazine/pyrimethamine | The American journal of tropical medicine and hygiene                                                                           | 77     | 4     | 612-6   | 17978058      |
| Rwagacondo et al.       | 2003 | Efficacy of amodiaquine alone and combined with sulfadoxine-pyrimethamine and of sulfadoxine pyrimethamine combined with artesunate                                                                                                                                                             | The American journal of tropical medicine and hygiene                                                                           | 68     | 6     | 743-7   | 12887037      |
| Rwagacondo et al.       | 2004 | Is amodiaquine failing in Rwanda? Efficacy of amodiaquine alone and combined with artesunate in children with uncomplicated malaria                                                                                                                                                             | Tropical medicine & international health : TM & IH                                                                              | 9      | 10    | 1091-8  | 15482401      |
| Sagara et al.           | 2006 | A randomized trial of artesunate-sulfamethoxyprazine-pyrimethamine versus artemether-lumefantrine for the treatment of uncomplicated Plasmodium falciparum malaria in Mali                                                                                                                      | The American journal of tropical medicine and hygiene                                                                           | 75     | 4     | 630-6   | 17038684      |
| Sagara et al.           | 2008 | A randomized trial of artesunate-mefloquine versus artemether-lumefantrine for treatment of uncomplicated Plasmodium falciparum malaria in Mali                                                                                                                                                 | The American journal of tropical medicine and hygiene                                                                           | 79     | 5     | 655-61  | 18981499      |
| Sagara et al.           | 2009 | Efficacy and safety of a fixed dose artesunate-sulphamethoxyprazine-pyrimethamine compared to artemether-lumefantrine for the treatment of uncomplicated falciparum malaria across Africa: a randomized multi-centre trial                                                                      | Malaria journal                                                                                                                 | 8      |       | 63      | 19366448      |
| Schwarz et al.          | 2005 | 5-day nonobserved artesunate monotherapy for treating uncomplicated Falciparum malaria in young Gabonese children                                                                                                                                                                               | The American journal of tropical medicine and hygiene                                                                           | 73     | 4     | 705-9   | 16222013      |

## Additional File 2 : References

| Authors               | Year  | Title                                                                                                                                                                                                                                   | Journal                                                                                              | Volume | Issue | Pages    | Accession No. |
|-----------------------|-------|-----------------------------------------------------------------------------------------------------------------------------------------------------------------------------------------------------------------------------------------|------------------------------------------------------------------------------------------------------|--------|-------|----------|---------------|
| Silachamroon et al.   | 2005  | An open, randomized trial of three-day treatment with artesunate combined with a standard dose of mefloquine divided over either two or three days, for acute, uncomplicated falciparum malaria                                         | The Southeast Asian journal of tropical medicine and public health                                   | 36     | 3     | 591-6    | 16124422      |
| Sirima et al.         | 2003  | Efficacy of artesunate plus chloroquine for the treatment of uncomplicated malaria in children in Burkina Faso: a double-blind, randomized, controlled trial                                                                            | Transactions of the Royal Society of Tropical Medicine and Hygiene                                   | 97     | 3     | 345-9    | 15228257      |
| Sirima et al.         | 2009  | The efficacy and safety of a new fixed-dose combination of amodiaquine and artesunate in young African children with acute uncomplicated Plasmodium falciparum                                                                          | Malaria journal                                                                                      | 8      |       | 48       | 19291301      |
| Sirivichayakul et al. | 2007  | Comparative study of the effectiveness and pharmacokinetics of two rectal artesunate/oral mefloquine combination regimens for the treatment of uncomplicated childhood falciparum malaria                                               | Annals of tropical paediatrics                                                                       | 27     | 1     | 17-24    | 17469728      |
| Smithuis et al.       | 2006  | Efficacy and effectiveness of dihydroartemisinin-piperaquine versus artesunate-mefloquine in falciparum malaria: an open-label randomised comparison                                                                                    | Lancet                                                                                               | 367    | 9528  | 2075-85  | 16798391      |
| Smithuis et al.       | 2010  | Effectiveness of five artemisinin combination regimens with or without primaquine in uncomplicated falciparum malaria: an open-label randomised trial                                                                                   | The Lancet infectious diseases                                                                       | 10     | 10    | 673-81   | 20832366      |
| Smithuis et al.       | 2004a | Optimising operational use of artesunate-mefloquine: a randomised comparison of four treatment regimens                                                                                                                                 | Transactions of the Royal Society of Tropical Medicine and Hygiene                                   | 98     | 3     | 182-92   | 15024929      |
| Smithuis et al.       | 2004b | Comparison of chloroquine, sulfadoxine/pyrimethamine, mefloquine and mefloquine-artesunate for the treatment of falciparum malaria in Kachin State, North Myanmar                                                                       | Tropical medicine & international health : TM & IH                                                   | 9      | 11    | 1184-90  | 15548314      |
| Song et al.           | 2011  | Randomized trials of artemisinin-piperaquine, dihydroartemisinin-piperaquine phosphate and artemether-lumefantrine for the treatment of multi-drug resistant falciparum malaria in Cambodia-Thailand border area                        | Malaria journal                                                                                      | 10     |       | 231      | 21827706      |
| Sowunmi et al.        | 2005  | Open randomized study of artesunate-amodiaquine vs. chloroquine-pyrimethamine-sulfadoxine for the treatment of uncomplicated Plasmodium falciparum malaria in Nigerian children                                                         | Tropical medicine & international health : TM & IH                                                   | 10     | 11    | 1161-70  | 16262741      |
| Sowunmi et al.        | 2009  | Therapeutic efficacy and effects of artesunate-mefloquine and mefloquine alone on malaria-associated anemia in children with uncomplicated Plasmodium falciparum malaria in southwest Nigeria                                           | The American journal of tropical medicine and hygiene                                                | 81     | 6     | 979-86   | 19996425      |
| Sowunmi et al.        | 2011  | Therapeutic Efficacy of Artesunate-Amodiaquine Combinations and the Plasma and Saliva Concentrations of Desethylamodiaquine in Children With Acute Uncomplicated Plasmodium falciparum Malaria                                          | American journal of therapeutics                                                                     |        |       |          | 21192244      |
| Sowunmi et al.        | 2007a | Activities of amodiaquine, artesunate, and artesunate-amodiaquine against asexual- and sexual-stage parasites in falciparum malaria in children                                                                                         | Antimicrobial agents and chemotherapy                                                                | 51     | 5     | 1694-9   | 17325222      |
| Sowunmi et al.        | 2007b | Therapeutic efficacy and effects of artemether-lumefantrine and amodiaquine-sulfalene-pyrimethamine on gametocyte carriage in children with uncomplicated Plasmodium falciparum malaria in southwestern Nigeria                         | The American journal of tropical medicine and hygiene                                                | 77     | 2     | 235-41   | 17690392      |
| Staedke et al.        | 2004  | Combination treatments for uncomplicated falciparum malaria in Kampala, Uganda: randomised clinical trial                                                                                                                               | Lancet                                                                                               | 364    | 9449  | 1950-7   | 15567011      |
| Stohrer et al.        | 2004  | Therapeutic efficacy of artemether-lumefantrine and artesunate-mefloquine for treatment of uncomplicated Plasmodium falciparum malaria in Luang Namtha Province, Lao People's Democratic Republic                                       | Tropical medicine & international health : TM & IH                                                   | 9      | 11    | 1175-83  | 15548313      |
| Suputtamongkol et al. | 2003  | The efficacy of combined mefloquine-artesunate versus mefloquine-primaquine on subsequent development of Plasmodium falciparum gametocytemia                                                                                            | The American journal of tropical medicine and hygiene                                                | 68     | 5     | 620-3    | 12812357      |
| Sutherland et al.     | 2003  | The addition of artesunate to chloroquine for treatment of Plasmodium falciparum malaria in Gambian children delays, but does not prevent treatment failure                                                                             | The American journal of tropical medicine and hygiene                                                | 69     | 1     | 19-25    | 12932091      |
| Sutherland et al.     | 2005  | Reduction of malaria transmission to Anopheles mosquitoes with a six-dose regimen of co-artemether                                                                                                                                      | PLoS medicine                                                                                        | 2      | 4     | e92      | 15839740      |
| Swarthout et al.      | 2006  | Artesunate + amodiaquine and artesunate + sulphadoxine-pyrimethamine for treatment of uncomplicated malaria in Democratic Republic of Congo: a clinical trial with determination of sulphadoxine and pyrimethamine-resistant haplotypes | Tropical medicine & international health : TM & IH                                                   | 11     | 10    | 1503-11  | 17002724      |
| Sykes et al.          | 2009  | Azithromycin plus artesunate versus artemether-lumefantrine for treatment of uncomplicated malaria in Tanzanian children: a randomized, controlled trial                                                                                | Clinical infectious diseases : an official publication of the Infectious Diseases Society of America | 49     | 8     | 1195-201 | 19769536      |



## Additional File 2 : References

| Authors              | Year  | Title                                                                                                                                                                                                                             | Journal                                                                                              | Volume | Issue | Pages   | Accession No. |
|----------------------|-------|-----------------------------------------------------------------------------------------------------------------------------------------------------------------------------------------------------------------------------------|------------------------------------------------------------------------------------------------------|--------|-------|---------|---------------|
| Tall et al.          | 2007  | Efficacy of artesunate plus amodiaquine, artesunate plus sulfadoxine-pyrimethamine, and chloroquine plus sulfadoxine-pyrimethamine in patients with uncomplicated Plasmodium falciparum in the Comoros Union                      | Acta tropica                                                                                         | 102    | 3     | 176-81  | 17568549      |
| Tangpukdee et al.    | 2005  | An open randomized clinical trial of Artekin vs artesunate-mefloquine in the treatment of acute uncomplicated falciparum malaria                                                                                                  | The Southeast Asian journal of tropical medicine and public health                                   | 36     | 5     | 1085-91 | 16438129      |
| Tangpukdee et al.    | 2008  | Efficacy of Artequick versus artesunate-mefloquine in the treatment of acute uncomplicated falciparum malaria in Thailand                                                                                                         | The Southeast Asian journal of tropical medicine and public health                                   | 39     | 1     | 1-8     | 18567436      |
| Thanh et al.         | 2009  | Open label randomized comparison of dihydroartemisinin-piperaquine and artesunate-amodiaquine for the treatment of uncomplicated Plasmodium falciparum malaria in central Vietnam                                                 | Tropical medicine & international health : TM & IH                                                   | 14     | 5     | 504-11  | 19320869      |
| Thapa et al.         | 2007  | Comparison of artemether-lumefantrine with sulfadoxine-pyrimethamine for the treatment of uncomplicated falciparum malaria in eastern Nepal                                                                                       | The American journal of tropical medicine and hygiene                                                | 77     | 3     | 423-30  | 17827354      |
| Thriemer et al.      | 2010  | Azithromycin combination therapy for the treatment of uncomplicated falciparum malaria in Bangladesh: an open-label randomized, controlled clinical trial                                                                         | The Journal of infectious diseases                                                                   | 202    | 3     | 392-8   | 20557237      |
| Thwing et al.        | 2009  | In-vivo efficacy of amodiaquine-artesunate in children with uncomplicated Plasmodium falciparum malaria in western Kenya                                                                                                          | Tropical medicine & international health : TM & IH                                                   | 14     | 3     | 294-300 | 19187521      |
| Tietche et al.       | 2010  | Tolerability and efficacy of a pediatric granule formulation of artesunate-mefloquine in young children from Cameroon with uncomplicated falciparum malaria                                                                       | The American journal of tropical medicine and hygiene                                                | 82     | 6     | 1034-40 | 20519597      |
| Tiono et al.         | 2009  | Chlorproguanil-dapsone-artesunate versus chlorproguanil-dapsone: a randomized, double-blind, phase III trial in African children, adolescents, and adults with uncomplicated Plasmodium falciparum malaria                        | The American journal of tropical medicine and hygiene                                                | 81     | 6     | 969-78  | 19996424      |
| Tijtra et al.        | 2001  | Therapy of uncomplicated falciparum malaria: a randomized trial comparing artesunate plus sulfadoxine-pyrimethamine versus sulfadoxine-pyrimethamine alone in Irian Jaya, Indonesia                                               | The American journal of tropical medicine and hygiene                                                | 65     | 4     | 309-17  | 11693875      |
| Toure et al.         | 2009  | A comparative, randomized clinical trial of artemisinin/naphtoquine twice daily one day versus artemether/lumefantrine six doses regimen in children and adults with uncomplicated falciparum malaria in Cote d'Ivoire            | Malaria journal                                                                                      | 8      |       | 148     | 19575797      |
| Toure et al.         | 2011  | Artesunate/mefloquine paediatric formulation vs. artemether/lumefantrine for the treatment of uncomplicated Plasmodium falciparum in Anonkoua koute, Cote d'Ivoire                                                                | Tropical medicine & international health : TM & IH                                                   | 16     | 3     | 290-7   | 21214690      |
| Trung et al.         | 2009  | A randomized, controlled trial of artemisinin-piperaquine vs dihydroartemisinin-piperaquine phosphate in treatment of falciparum malaria                                                                                          | Chinese journal of integrative medicine                                                              | 15     | 3     | 189-92  | 19568711      |
| Tshetu et al         | 2010  | Efficacy and safety of a fixed-dose oral combination of pyronaridine-artesunate compared with artemether-lumefantrine in children and adults with uncomplicated Plasmodium falciparum malaria: a randomised non-inferiority trial | Lancet                                                                                               | 375    | 9724  | 1457-67 | 20417857      |
| Tun et al.           | 2009  | Efficacy of oral single dose therapy with artemisinin-naphthoquine phosphate in uncomplicated falciparum malaria                                                                                                                  | Acta tropica                                                                                         | 111    | 3     | 275-8   | 19464245      |
| Ursing et al.        | 2011  | Similar efficacy and tolerability of double-dose chloroquine and artemether-lumefantrine for treatment of Plasmodium falciparum infection in Guinea-Bissau: a randomized trial                                                    | The Journal of infectious diseases                                                                   | 203    | 1     | 109-16  | 21148503      |
| Valecha et al.       | 2009  | Therapeutic efficacy of artemether-lumefantrine in uncomplicated falciparum malaria in India                                                                                                                                      | Malaria journal                                                                                      | 8      |       | 107     | 19454000      |
| Valecha et al.       | 2010a | Arterolane, a new synthetic trioxolane for treatment of uncomplicated Plasmodium falciparum malaria: a phase II, multicenter, randomized, dose-finding clinical trial                                                             | Clinical infectious diseases : an official publication of the Infectious Diseases Society of America | 51     | 6     | 684-91  | 20687837      |
| Valecha et al.       | 2010b | An open-label, randomised study of dihydroartemisinin-piperaquine versus artesunate-mefloquine for falciparum malaria in Asia                                                                                                     | PLoS one                                                                                             | 5      | 7     | e11880  | 20689583      |
| van den Broek et al. | 2006  | Efficacy of three artemisinin combination therapies for the treatment of uncomplicated Plasmodium falciparum malaria in the Republic of Congo                                                                                     | Malaria journal                                                                                      | 5      |       | 113     | 17125496      |
| van den Broek et al. | 2005a | Efficacy of two artemisinin combination therapies for uncomplicated falciparum malaria in children under 5 years, Malakal, Upper Nile, Sudan                                                                                      | Malaria journal                                                                                      | 4      | 1     | 14      | 15730557      |
| van den Broek et al. | 2005b | Efficacy of chloroquine + sulfadoxine-pyrimethamine, mefloquine + artesunate and artemether + lumefantrine combination therapies to treat Plasmodium falciparum malaria in the Chittagong Hill Tracts, Bangladesh                 | Transactions of the Royal Society of Tropical Medicine and Hygiene                                   | 99     | 10    | 727-35  | 16095643      |

## Additional File 2 : References

| Authors             | Year  | Title                                                                                                                                                                                                                | Journal                                                                                              | Volume | Issue | Pages    | Accession No. |
|---------------------|-------|----------------------------------------------------------------------------------------------------------------------------------------------------------------------------------------------------------------------|------------------------------------------------------------------------------------------------------|--------|-------|----------|---------------|
| van Vugt et al.     | 2000  | Artemether-lumefantrine for the treatment of multidrug-resistant falciparum malaria                                                                                                                                  | Transactions of the Royal Society of Tropical Medicine and Hygiene                                   | 94     | 5     | 545-8    | 11132386      |
| van Vugt et al.     | 2002  | Treatment of uncomplicated multidrug-resistant falciparum malaria with artesunate-atovaquone-proguanil                                                                                                               | Clinical infectious diseases : an official publication of the Infectious Diseases Society of America | 35     | 12    | 1498-504 | 12471569      |
| Vasquez et al.      | 2009  | Therapeutic efficacy of a regimen of artesunate-mefloquine-primaquine treatment for Plasmodium falciparum malaria and treatment effects on gametocytic development                                                   | Biomedica : revista del Instituto Nacional de Salud                                                  | 29     | 2     | 307-19   | 20128355      |
| von Seidlein et al. | 2000  | Efficacy of artesunate plus pyrimethamine-sulphadoxine for uncomplicated malaria in Gambian children: a double-blind, randomised, controlled trial                                                                   | Lancet                                                                                               | 355    | 9201  | 352-7    | 10665554      |
| von Seidlein et al. | 2001  | Parasitaemia and gametocytaemia after treatment with chloroquine, pyrimethamine/sulfadoxine, and pyrimethamine/sulfadoxine combined with artesunate in young Gambians with uncomplicated malaria                     | Tropical medicine & international health : TM & IH                                                   | 6      | 2     | 92-8     | 11251903      |
| Wang et al.         | 2001  | Efficacy of dihydroartemisinin-mefloquine on acute uncomplicated falciparum malaria                                                                                                                                  | Chinese medical journal                                                                              | 114    | 6     | 612-3    | 11780437      |
| Warsame et al.      | 2009  | Efficacy of monotherapies and artesunate-based combination therapies in children with uncomplicated malaria in Somalia                                                                                               | Acta tropica                                                                                         | 109    | 2     | 146-51   | 19026606      |
| Wattanakoon et al.  | 2003  | Six-years monitoring the efficacy of the combination of artesunate and mefloquine for the treatment of uncomplicated falciparum malaria                                                                              | The Southeast Asian journal of tropical medicine and public health                                   | 34     | 3     | 542-5    | 15115124      |
| Weerasinghe et al.  | 2002  | A safety and efficacy trial of artesunate, sulphadoxine-pyrimethamine and primaquine in P falciparum malaria                                                                                                         | The Ceylon medical journal                                                                           | 47     | 3     | 83-5     | 12449772      |
| Whegang et al.      | 2010  | Efficacy of non-artemisinin- and artemisinin-based combination therapies for uncomplicated falciparum malaria in Cameroon                                                                                            | Malaria journal                                                                                      | 9      |       | 56       | 20170477      |
| Wong et al.         | 2003  | Therapeutic equivalence of a low dose artemisinin formulation in falciparum malaria patients                                                                                                                         | The Journal of pharmacy and pharmacology                                                             | 55     | 2     | 193-8    | 12631411      |
| Wootton et al.      | 2008  | Open-label comparative clinical study of chlorproguanil-dapsone fixed dose combination (Lapdap) alone or with three different doses of artesunate for uncomplicated Plasmodium falciparum malaria                    | PloS one                                                                                             | 3      | 3     | e1779    | 18320064      |
| Yavo et al.         | 2011  | Multicentric assessment of the efficacy and tolerability of dihydroartemisinin-piperaquine compared to artemether-lumefantrine in the treatment of uncomplicated Plasmodium falciparum malaria in sub-Saharan Africa | Malaria journal                                                                                      | 10     |       | 198      | 21774826      |
| Yeka et al.         | 2005  | Artemisinin versus nonartemisinin combination therapy for uncomplicated malaria: randomized clinical trials from four sites in Uganda                                                                                | PLoS medicine                                                                                        | 2      | 7     | e190     | 16033307      |
| Yeka et al.         | 2008  | Artemether-lumefantrine versus dihydroartemisinin-piperaquine for treating uncomplicated malaria: a randomized trial to guide policy in Uganda                                                                       | PloS one                                                                                             | 3      | 6     | e2390    | 18545692      |
| Zongo et al.        | 2007a | Artemether-lumefantrine versus amodiaquine plus sulfadoxine-pyrimethamine for uncomplicated falciparum malaria in Burkina Faso: a randomised non-inferiority trial                                                   | Lancet                                                                                               | 369    | 9560  | 491-8    | 17292769      |
| Zongo et al.        | 2007b | Randomized comparison of amodiaquine plus sulfadoxine-pyrimethamine, artemether-lumefantrine, and dihydroartemisinin-piperaquine for the treatment of uncomplicated Plasmodium falciparum malaria in Burkina Faso    | Clinical infectious diseases : an official publication of the Infectious Diseases Society of America | 45     | 11    | 1453-61  | 17990228      |
| Zoungrana et al.    | 2008  | Safety and efficacy of methylene blue combined with artesunate or amodiaquine for uncomplicated falciparum malaria: a randomized controlled trial from Burkina Faso                                                  | PloS one                                                                                             | 3      | 2     | e1630    | 18286187      |
